# Supplementary material
Source: PubMed Central journal article supplement (PMC3083868)
Supplement: supp_JCO.2010.31.3577_DS.pdf [file supp_JCO.2010.31.3577_DS.pdf]

# DNA Methylation Array Analysis Identifies Profiles of Blood-derived DNA Methylation Associated with Bladder Cancer

Marsit et al

Data Supplement

## Supplemental Figure Legends

**Supplemental Figure 1.** Boxplots of methylation values by class for each of the 9 loci selected for the panel within the testing data. Dark horizontal lines represent the mean, with the box representing the 25<sup>th</sup> and 75<sup>th</sup> percentiles, the whiskers the 5<sup>th</sup> and 95<sup>th</sup> percentiles, and outliers represented by dots.

**Supplemental Figure 2.** Boxplots of methylation values of each of the loci in the testing data in controls (0) and cases (1). Dark horizontal lines represent the mean, with the box representing the 25<sup>th</sup> and 75<sup>th</sup> percentiles, the whiskers the 5<sup>th</sup> and 95<sup>th</sup> percentiles, and outliers represented by dots.

**Supplemental Figure 3.** Receiver operator curve (ROC) analysis of methylation-based bladder cancer prediction using LASSO method. (A) ROC based on a model fit using the 1000 most variable loci. (B) ROC based on a model fit using the 1000 loci most strongly associated with bladder cancer status. (C) ROC based on a model fit using the 1000 most variable and controlled for patient age, gender, smoking status, and family history of bladder cancer. (D) ROC based on a model fit using the 1000 loci most strongly associated with bladder cancer status and controlled for patient age, gender, smoking status, and family history of bladder cancer. Shaded areas represent bootstrap-derived 95% confidence intervals.

Supp Fig. 1

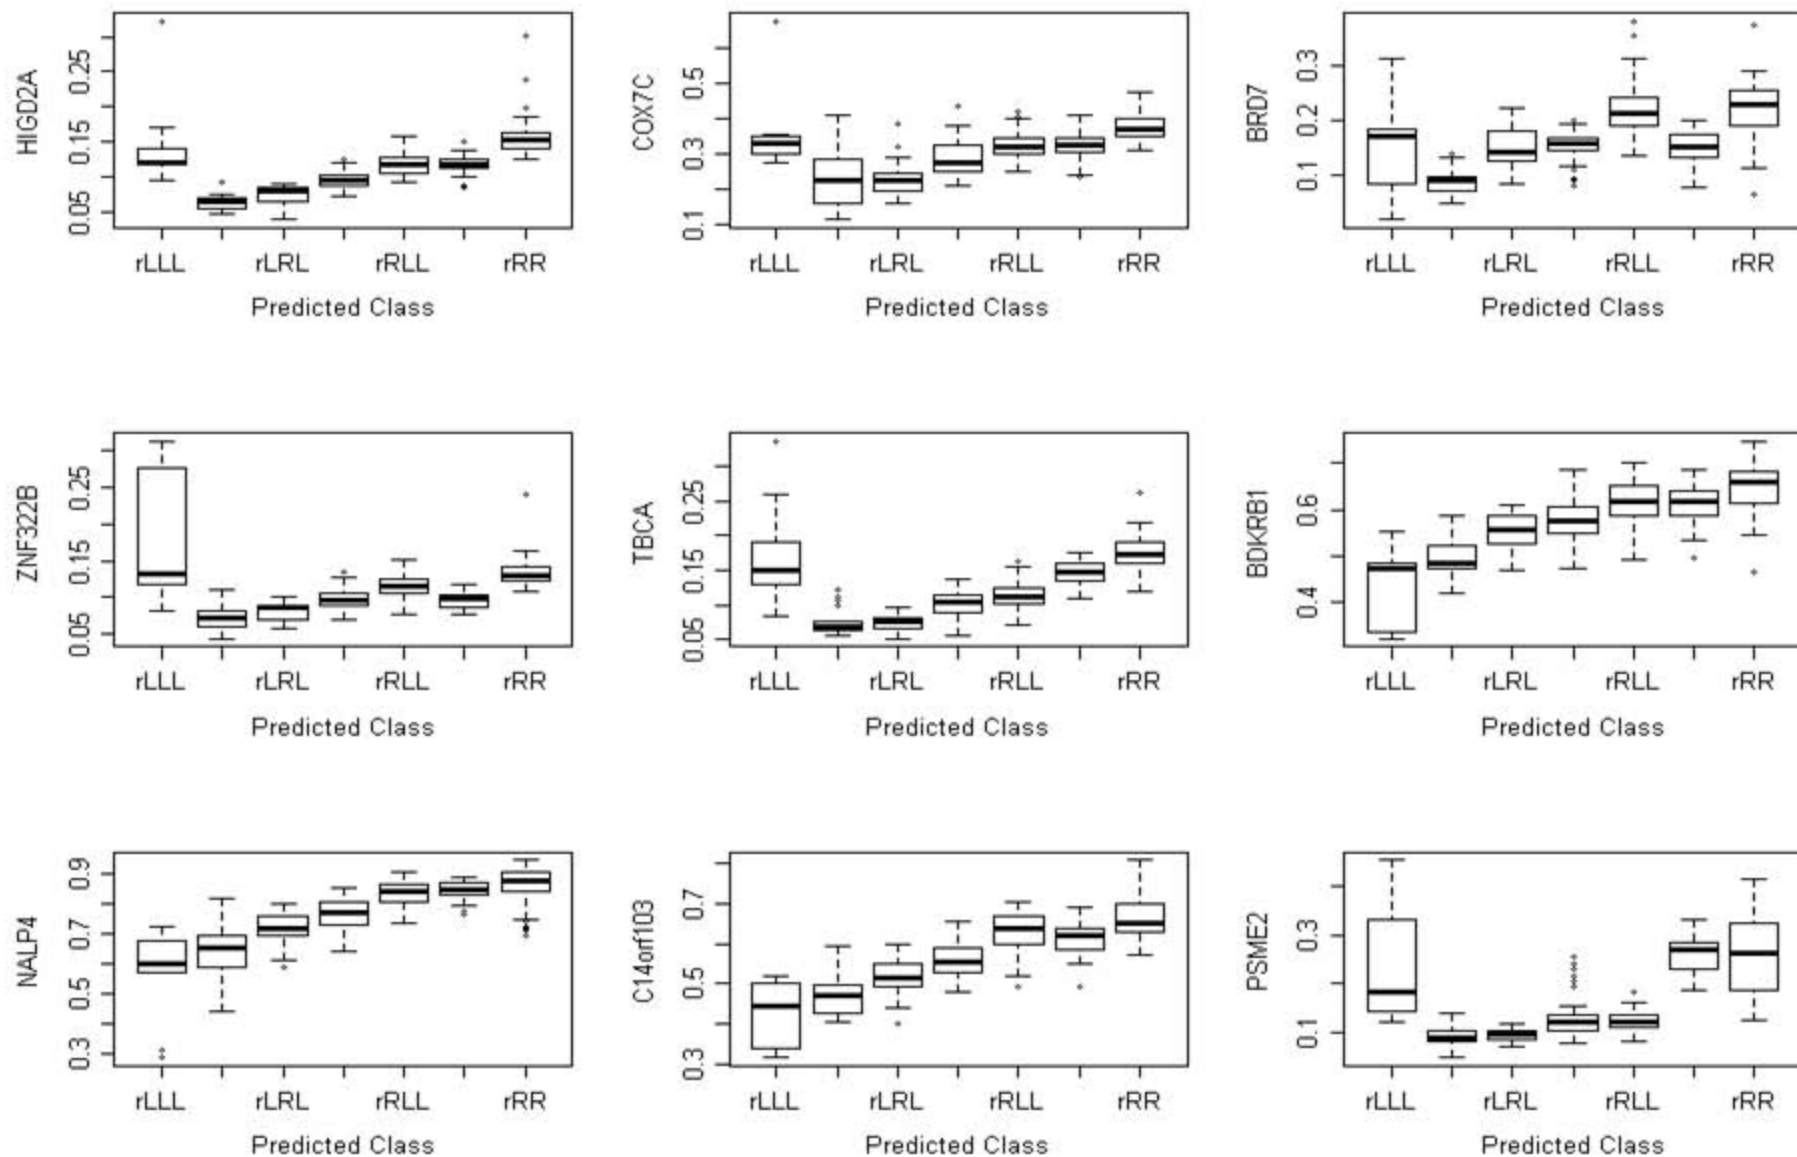

# Supp. Fig 2.

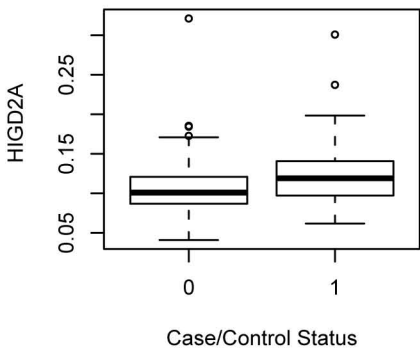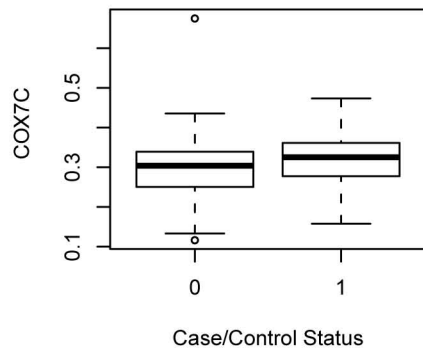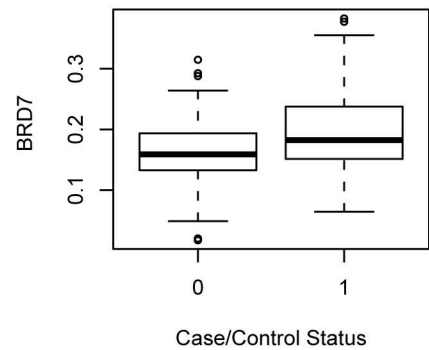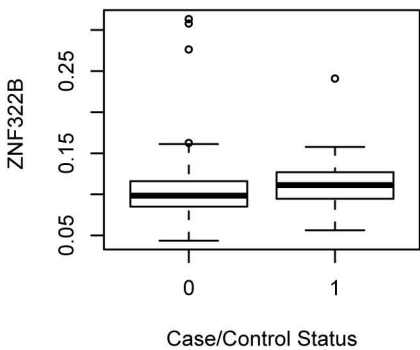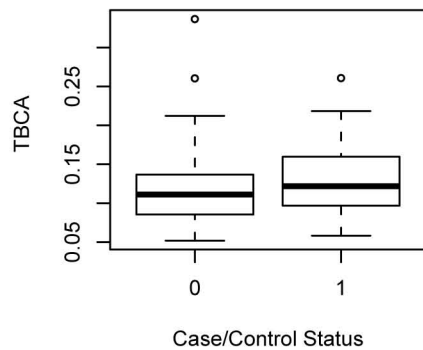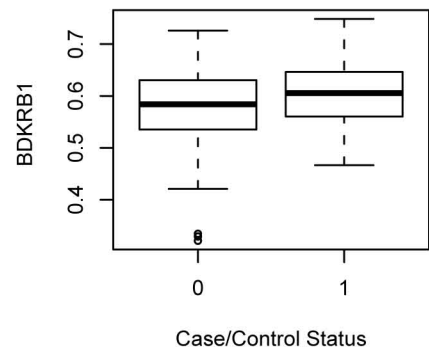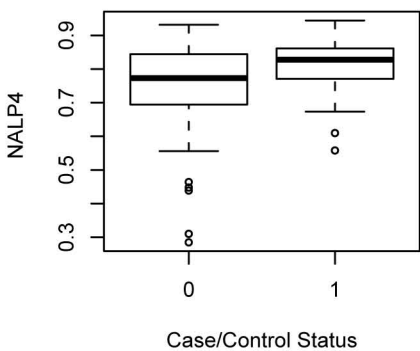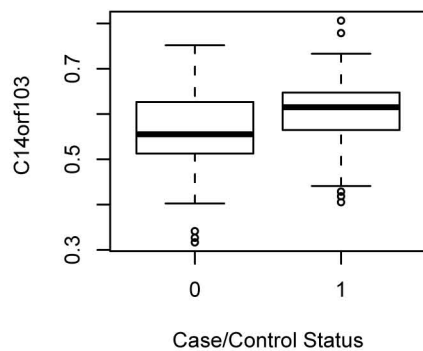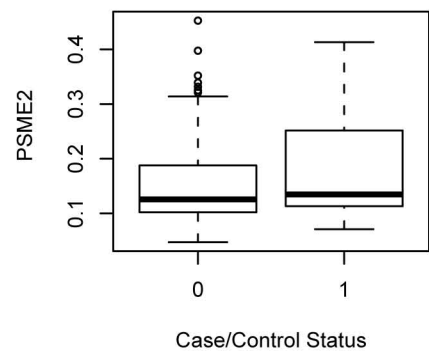

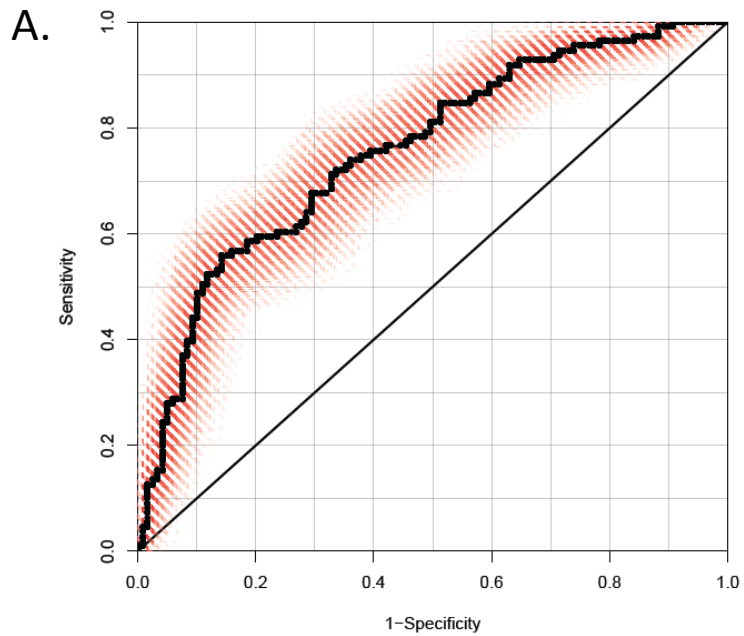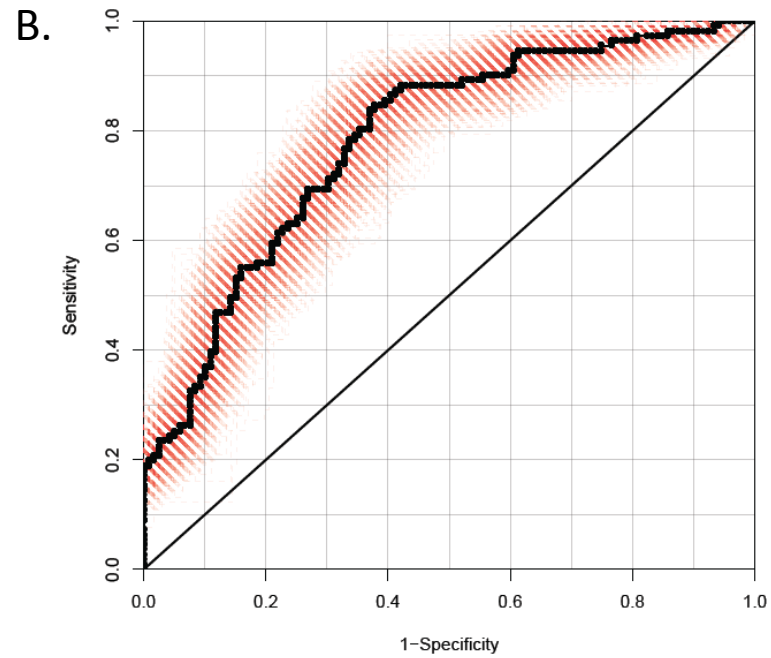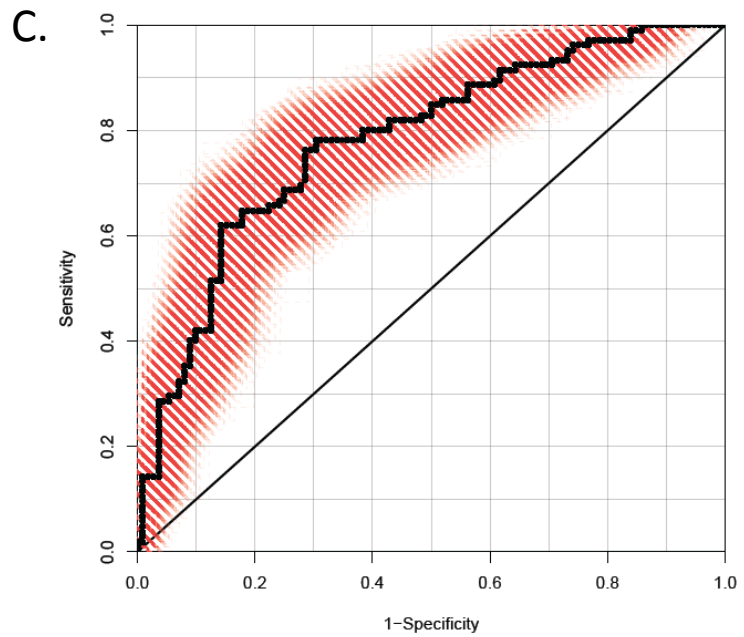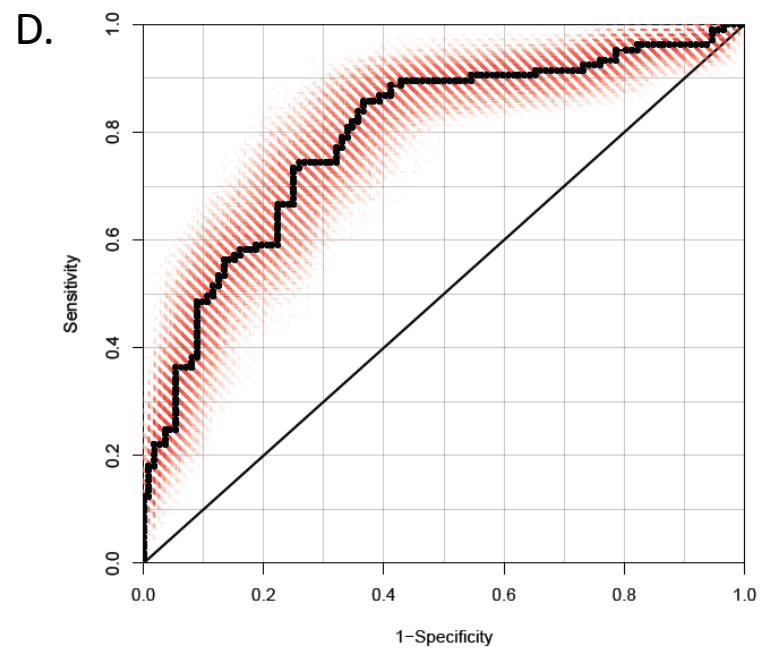

**Supplementary Table 1. Characteristics of the subjects in the training and Testing Sets**

| <b>Characteristic</b>                    | <b>Training Set</b> |              | <b>Testing Set</b> |              |
|------------------------------------------|---------------------|--------------|--------------------|--------------|
|                                          | <b>Controls</b>     | <b>Cases</b> | <b>Controls</b>    | <b>Cases</b> |
| <b>Total n</b>                           | 118                 | 112          | 119                | 111          |
| <b>Subject Age</b> (yrs), median (range) | 65 (28-74)          | 66 (29-74)   | 65 (32-74)         | 66 (25-74)   |
| <b>Gender</b> , n(%)                     |                     |              |                    |              |
| Male                                     | 79 (48)             | 86 (52)      | 79 (48)            | 85 (52)      |
| Female                                   | 39 (60)             | 26 (40)      | 40 (61)            | 26 (39)      |
| <b>Smoking History</b>                   |                     |              |                    |              |
| Never                                    | 36 (64)             | 20 (36)      | 36 (64)            | 20 (36)      |
| Former                                   | 62 (53)             | 55 (47)      | 64 (53)            | 56 (47)      |
| Current                                  | 20 (35)             | 37 (65)      | 19 (35)            | 35 (65)      |

\*Data on family history not available on 13 subjects

**Supplementary Table 2. Odds Ratios and 95% Confidence Intervals for Bladder Cancer for Pairwise Comparisons of Each Class.**

|              |       | 95% CI |       |
|--------------|-------|--------|-------|
| Contrast     | OR    | Lower  | Upper |
| rLLR vs rLLL | 0.69  | 0.09   | 5.08  |
| rLRL vs rLLL | 1.75  | 0.28   | 11.15 |
| rLRR vs rLLL | 1.30  | 0.22   | 7.51  |
| rRLL vs rLLL | 5.97  | 1.03   | 34.48 |
| rRLR vs rLLL | 4.53  | 0.71   | 28.95 |
| rRR vs rLLL  | 8.71  | 1.46   | 52.15 |
| rLRL vs rLLR | 2.54  | 0.59   | 10.92 |
| rLRR vs rLLR | 1.88  | 0.51   | 6.88  |
| rRLL vs rLLR | 8.64  | 2.36   | 31.68 |
| rRLR vs rLLR | 6.55  | 1.54   | 27.97 |
| rRR vs rLLR  | 12.62 | 3.22   | 49.38 |
| rLRR vs rLRL | 0.74  | 0.25   | 2.23  |
| rRLL vs rLRL | 3.41  | 1.14   | 10.21 |
| rRLR vs rLRL | 2.58  | 0.73   | 9.14  |
| rRR vs rLRL  | 4.97  | 1.55   | 15.96 |
| rRLL vs rLRR | 4.59  | 1.92   | 10.96 |
| rRLR vs rLRR | 3.48  | 1.19   | 10.21 |
| rRR vs rLRR  | 6.70  | 2.55   | 17.61 |
| rRLR vs rRLL | 0.76  | 0.26   | 2.18  |
| rRR vs rRLL  | 1.46  | 0.56   | 3.79  |
| rRR vs rRLR  | 1.92  | 0.63   | 5.86  |

Note: All reported odds-ratio computations were controlled for age, gender, smoking status, and family history of disease.

**Supplementary Table 3. Loci Utilized in LASSO-based Bladder Cancer Prediction Models.**

| Model 1 - Based on 1000 most variable loci |             | Model 2 - Based on 1000 loci most associated with case status |             |            |             |
|--------------------------------------------|-------------|---------------------------------------------------------------|-------------|------------|-------------|
| CpGName                                    | Gene Symbol | CpGName                                                       | Gene Symbol | CpGName    | Gene Symbol |
| cg03606258                                 | GNAS        | cg25307081                                                    | BRD7        | cg11159299 | GZMM        |
| cg15383120                                 | DUSP22      | cg10238171                                                    | BDKRB1      | cg06572974 | CHD2        |
| cg17267907                                 | DEFA1       | cg07081888                                                    | NALP4       | cg14178895 | C6orf105    |
| cg03962522                                 | SLC5A1      | cg20118424                                                    | ABCB11      | cg20179697 | SNX9        |
| cg17003970                                 | CHFR        | cg01605517                                                    | AHCTF1      | cg01450842 | SALF        |
| cg09748975                                 | MSX1        | cg13064571                                                    | C8orf44     | cg23352030 | PRIC285     |
| cg15720535                                 | AGPAT2      | cg13442811                                                    | KIAA1128    | cg04151683 | LRRN6C      |
| cg16192575                                 | PTPN20B     | cg23196557                                                    | FLJ44691    | cg13944141 | PRSS2       |
| cg05358404                                 | RTEL1       | cg18236721                                                    | C9orf26     | cg25345738 | PWP1        |
| cg15915418                                 | TLE1        | cg20630386                                                    | AFP         | cg01346718 | CSNK1E      |
| cg08585897                                 | TERF2IP     | cg20366832                                                    | LLGL2       | cg19573166 | SLC22A17    |
| cg20389709                                 | KLF11       | cg18156583                                                    | IL18RAP     | cg09076584 | FLJ25006    |
| cg15584813                                 | SLC38A4     | cg26755793                                                    | KCTD1       | cg13628514 | TRPV4       |
| cg23629496                                 | C20orf75    | cg15339605                                                    | TFEC        | cg13149996 | EIF4G3      |
| cg16547341                                 | USP29       | cg02169430                                                    | CHD2        | cg27094188 | EIF2C1      |
| cg10157098                                 | NYD-SP18    | cg03536003                                                    | TMPRSS11D   | cg13383491 | GPR85       |
| cg08471713                                 | MEOX1       | cg17099569                                                    | GLI2        | cg11833861 | TMEM98      |
| cg27120999                                 | HSPA2       | cg11503011                                                    | EBF         | cg25374854 | ABR         |
| cg23065097                                 | FKBP1B      | cg04039397                                                    | CD96        | cg03605761 | RNF126      |
| cg13334277                                 | SPACA1      | cg22730004                                                    | SPTA1       | cg21602520 | BCL2        |
| cg10669058                                 | CILP2       | cg17687883                                                    | MTHFD2      | cg24133080 | RGS18       |
| cg17687883                                 | MTHFD2      | cg27394566                                                    | PLD4        | cg02214188 | BDH2        |
| cg06572974                                 | CHD2        | cg00136405                                                    | IL21        | cg17895149 | PLAGL1      |
| cg04155793                                 | CDK10       | cg00461841                                                    | ATF7IP2     |            |             |
| cg20118424                                 | ABCB11      | cg16519742                                                    | ZIM2        |            |             |
| cg24993443                                 | SNRPN       | cg11220060                                                    | KLF1        |            |             |
| cg19319069                                 | UBE2H       | cg19356189                                                    | KLK10       |            |             |
| cg20066612                                 | KCNJ9       | cg26149550                                                    | KLK15       |            |             |
| cg16005224                                 | SLC5A8      | cg19399100                                                    | UGT2A1      |            |             |
| cg14576824                                 | RPS6KC1     | cg05507459                                                    | C9orf121    |            |             |
| cg05696092                                 | NOSIP       | cg05026186                                                    | ABLIM3      |            |             |
| cg06258834                                 | KLK7        | cg08972170                                                    | Ells1       |            |             |
| cg23606079                                 | CRISPLD2    | cg08471713                                                    | MEOX1       |            |             |
| cg20615832                                 | PF4V1       | cg19646028                                                    | C19orf30    |            |             |
| cg03032025                                 | CPEB4       | cg04790874                                                    | CD79A       |            |             |
| cg03605761                                 | RNF126      | cg19319069                                                    | UBE2H       |            |             |
| cg16519742                                 | ZIM2        | cg13246269                                                    | AQP7        |            |             |
| cg17103109                                 | HLA-DOB     | cg23216015                                                    | C7orf16     |            |             |
| cg18474934                                 | TRPC3       | cg25084878                                                    | FBN2        |            |             |
| cg23713742                                 | SPAG4       | cg15129294                                                    | CCL4L2      |            |             |
| cg24642468                                 | MGC33367    | cg24417499                                                    | HPCA        |            |             |
| cg16907488                                 | CCDC17      | cg05719902                                                    | LOC136306   |            |             |
| cg15129294                                 | CCL4L2      | cg27425675                                                    | DEXI        |            |             |
| cg22401066                                 | SMPDL3A     |                                                               |             |            |             |
| cg15528736                                 | FCGRT       |                                                               |             |            |             |
| cg11473104                                 | NUDT15      |                                                               |             |            |             |
| cg12331980                                 | FLJ39502    |                                                               |             |            |             |
| cg08920071                                 | IGSF2       |                                                               |             |            |             |
